# Supplementary material for: Screening for active constituents in Turkish galls against ulcerative colitis by mass spectrometry guided preparative chromatography strategy:in silico,in vitroandin vivostudy
Source: Royal Society of Chemistry journal article supplement (doi:10.1039/c8fo01439f), 2018-01-01
Supplement: c8fo01439f1.pdf [file c8fo01439f1.pdf]

## Supplementary information

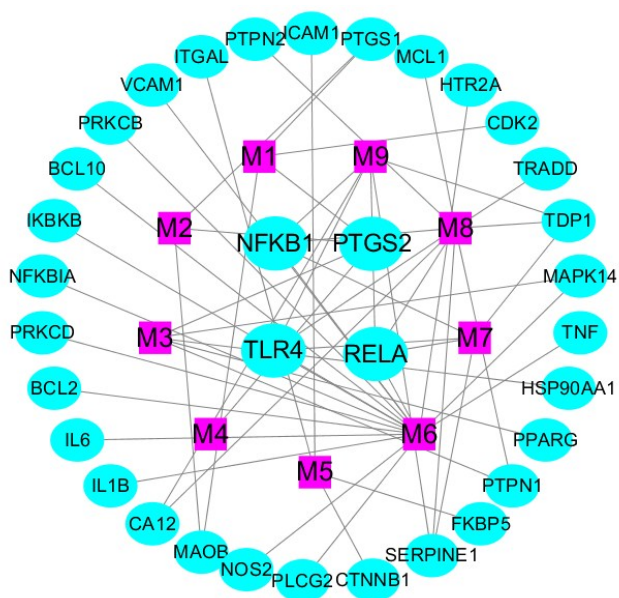

**Figure S1 | C-T network.** A target node and constituent node are linked if the protein is targeted by the corresponding constituent. The node size is proportional to its degree. The dark pink rectangle represents the active compounds. The light blue circles represent the responding targets.

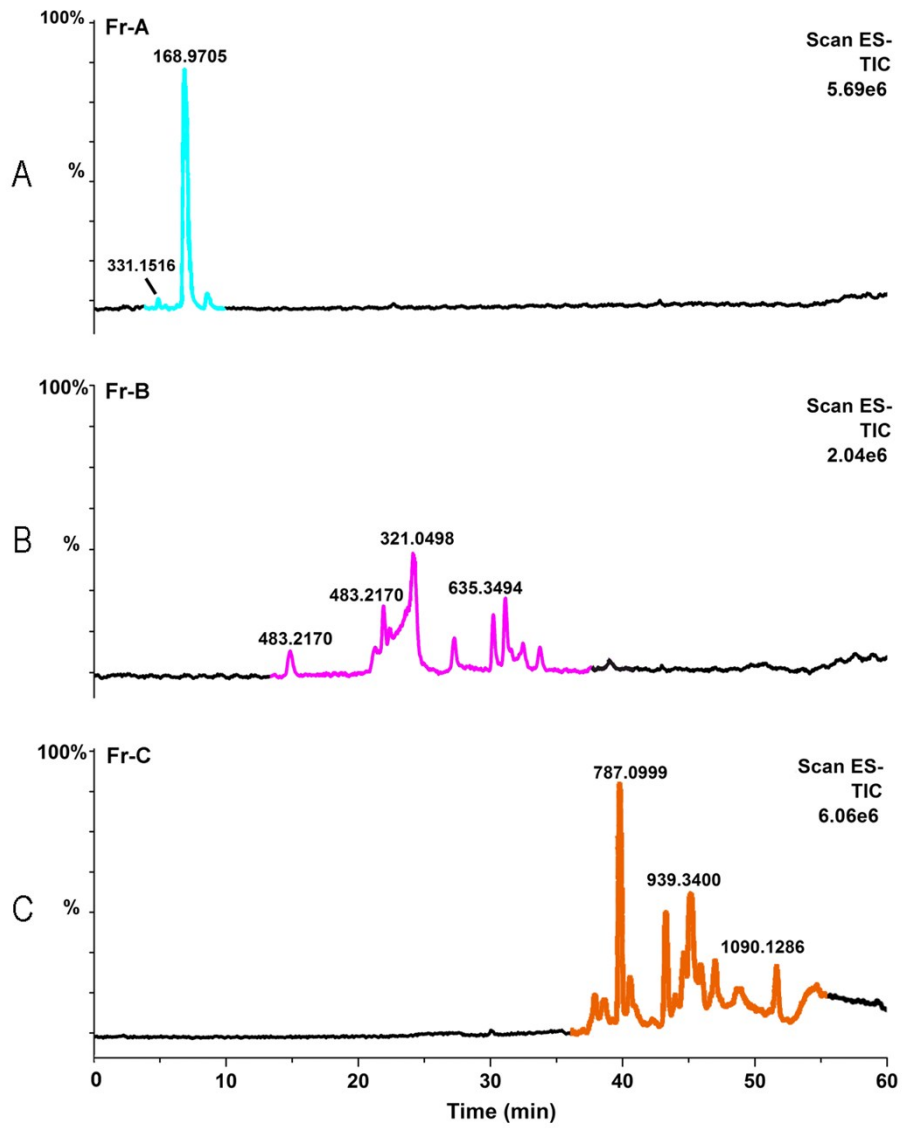

**Figure S2 | HPLC-MS analysis of different fraction from Turkish galls. (A) Fr-A. (B) Fr-B. (C) Fr-C.**

**Table S1 | Chemical composition of different fractions**

| Name                                 | RT<br>(min)                          | [M-H] <sup>-</sup><br><i>m/z</i> | Fr-A | Fr-B | Fr-C |
|--------------------------------------|--------------------------------------|----------------------------------|------|------|------|
| mono- <i>O</i> -galloyl-β-D-glucose  | 4.62                                 | 331.20                           | +    | -    | -    |
| gallic acid                          | 6.87                                 | 169.07                           | +    | -    | -    |
| digallic acid                        | 22.85, 24.97                         | 321.09                           | -    | +    | -    |
| di- <i>O</i> -galloyl-β-D-glucose    | 15.69, 22.17                         | 483.27                           | -    | +    | -    |
| methyl gallate                       | 22.80                                | 183.02                           | -    | +    | -    |
| tri- <i>O</i> -galloyl-β-D-glucose   | 27.89, 30.58, 31.54,<br>32.88, 34.27 | 635.35                           | -    | +    | -    |
| tetra- <i>O</i> -galloyl-β-D-glucose | 37.96, 39.31, 40.22                  | 787.25                           | -    | -    | +    |
| penta- <i>O</i> -galloyl-β-D-glucose | 43.26, 44.41, 44.97                  | 939.27                           | -    | -    | +    |
| hexa- <i>O</i> -galloyl-β-D-glucose  | 46.99, 48.82, 56.02                  | 1090.63                          | -    | -    | +    |

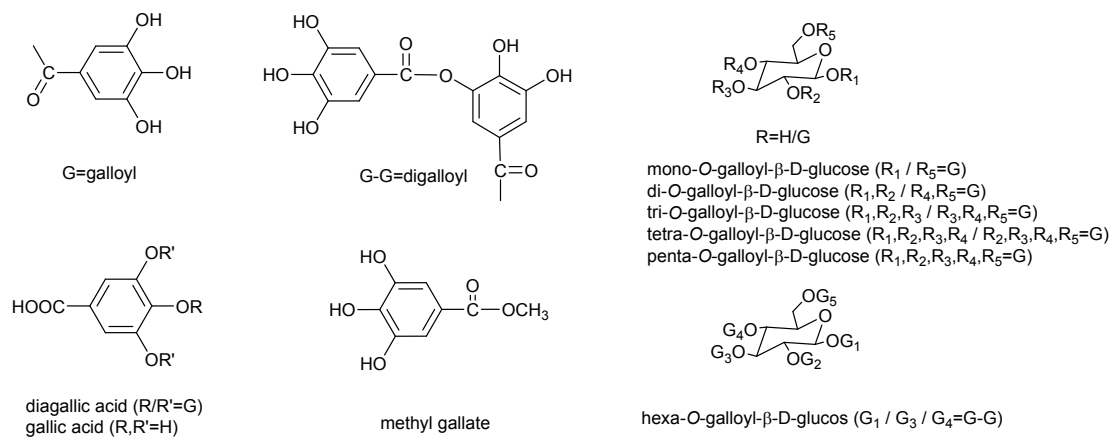

**Figure S3 | Chemical structure of 9 constituents from Turkish galls**
